# Supplementary material for: Nelumbo nucifera leaves extracts inhibit mouse airway smooth muscle contraction
Source: Springer Nature journal article supplement (doi:10.1186/s12906-017-1674-7), 2017-03-20

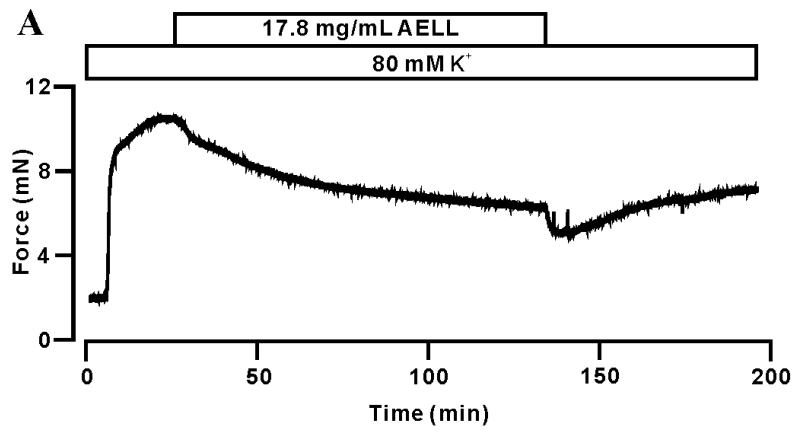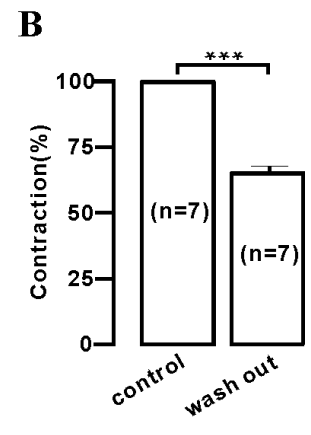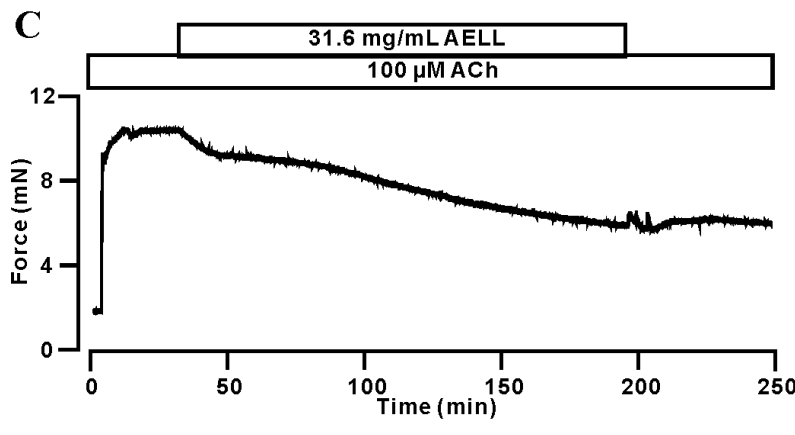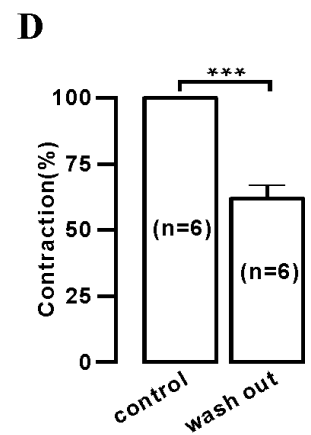

Supplement: MOESM1 [file 12157708]
